# Supplementary material for: Transcriptomic repertoires depict the initiation of lint and fuzz fibres in cotton (Gossypium hirsutum L.)
Source: PubMed Central journal article supplement (PMC5902776; doi:10.1111/pbi.12844), 2017-10-18
Supplement: PBI-16-1002-s001.pdf [file PBI-16-1002-s001.pdf]

## Supplementary Figures

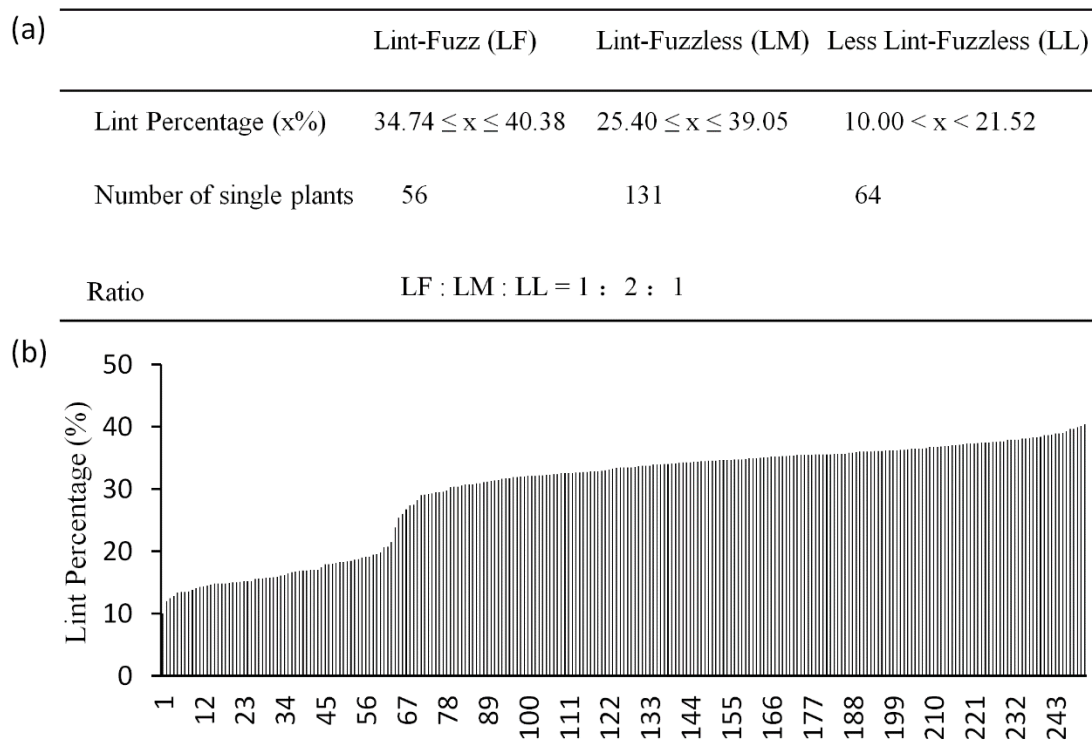

Figure S1 Lint percentage of three representative lines. (a) The lint percentage ranges and the corresponding plant numbers of three representative lines. The ratio between each line is 1:2:1. (b) Lint percentage of 251 single plants.

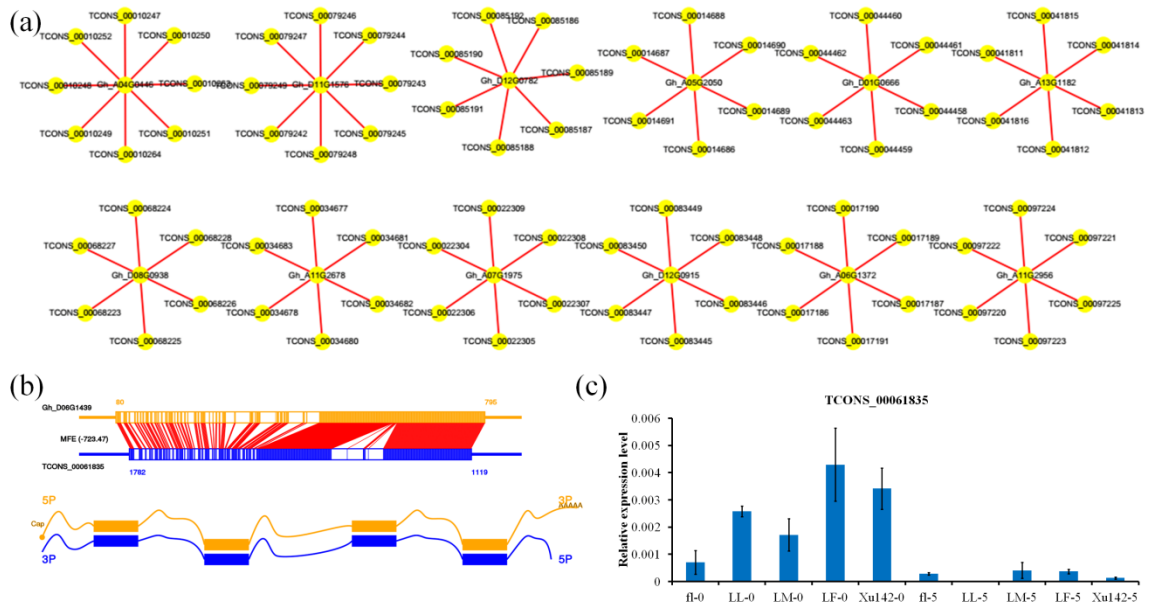

Figure S2 Protein-coding genes interacted with lncRNAs, and the interaction model of pcRNAs and lncRNAs. (a) Multiple lncRNAs interacted with one protein-coding gene. (b) Gh\_D06G1439 interacted with TCONS\_00061835 at the nucleic acid level. (c) The expression of TCONS\_00061835 was detected in ten samples.

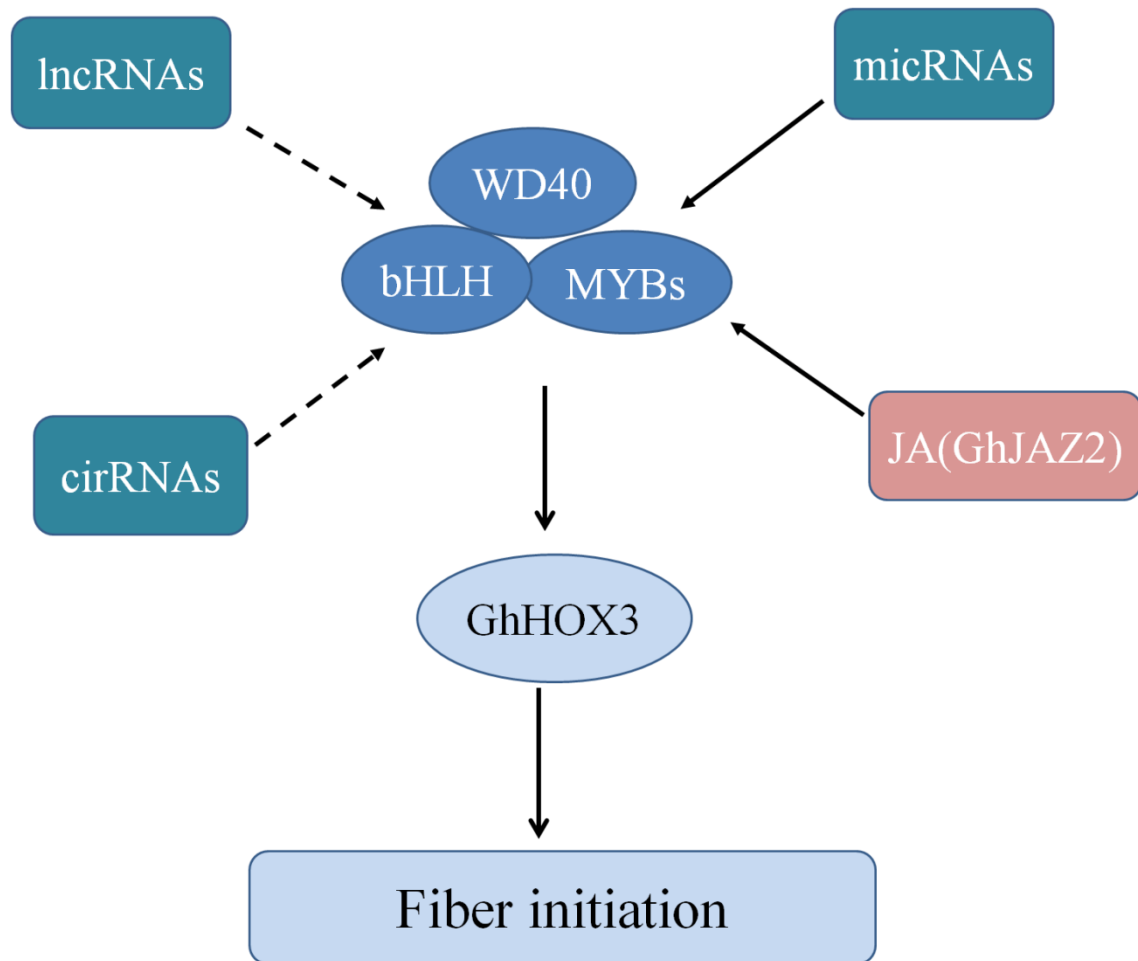

Figure S3 The model of miRNAs, lncRNAs, circRNAs and protein coding genes in regulating fiber initiation. In this network, miRNAs and GhJAZ2 affected R2R3-MYB transcription factors to regulate cotton fiber development. lncRNAs and circRNAs may target WD-repeat/bHLH/MYB complex expression to control cotton fiber development.
